# Supplementary material for: Substitution pattern controlled charge transport in BN-embedded aromatics-based single molecule junctions
Source: Royal Society of Chemistry journal article supplement (doi:10.1039/d1cp04671c), 2021-12-22
Supplement: d1cp04671c1.pdf [file d1cp04671c1.pdf]

# Substitution Pattern Controlled Charge Transport in BN-Embedded Aromatics-Based Single-Molecule Junctions

Rui Wang,<sup>a</sup> Kai Song,<sup>b</sup> Caiyun Wei,<sup>c</sup> Wenjing Hong,<sup>c</sup> Yaping Zang,<sup>\*b</sup> Dahui Qu,<sup>\*a</sup> Hongxiang Li<sup>\*a</sup>

a. Key Laboratory for Advanced Materials and Joint International Research Laboratory of Precision Chemistry and Molecular Engineering, Feringa Nobel Prize Scientist Joint Research Center, Frontiers Science Center for Materiobiology and Dynamic Chemistry, Institute of Fine Chemicals, School of Chemistry and Molecular Engineering, East China University of Science and Technology, Shanghai, 200237, P. R. China. E-mail: dahui\_qu@ecust.edu.cn; hongxiangli@ecust.edu.cn

b. Key Laboratory of Organic Solid, Institute of Chemistry, Chinese Academy of Sciences (ICCAS), Beijing, 100190, P. R. China. E-mail: zangyaping@iccas.ac.cn.

c. State Key Laboratory of Physical Chemistry of Solid Surfaces, College of Chemistry and Chemical Engineering, Xiamen University, Xiamen, 361005, P. R. China.

## Table of Contents

1. Fluoride anion titrations experiments.
2. Cyclic voltammograms experiments
3. Summarized photophysical and electrochemical parameter
4. Single-crystal X-ray structure and crystal data of p-BN-p
5. The frontier molecular orbitals and energy levels calculated from DFT
6. Synthetic routes
7. <sup>1</sup>H NMR, <sup>13</sup>C NMR and HRMS spectra.

## 1. Fluoride anion titrations experiments

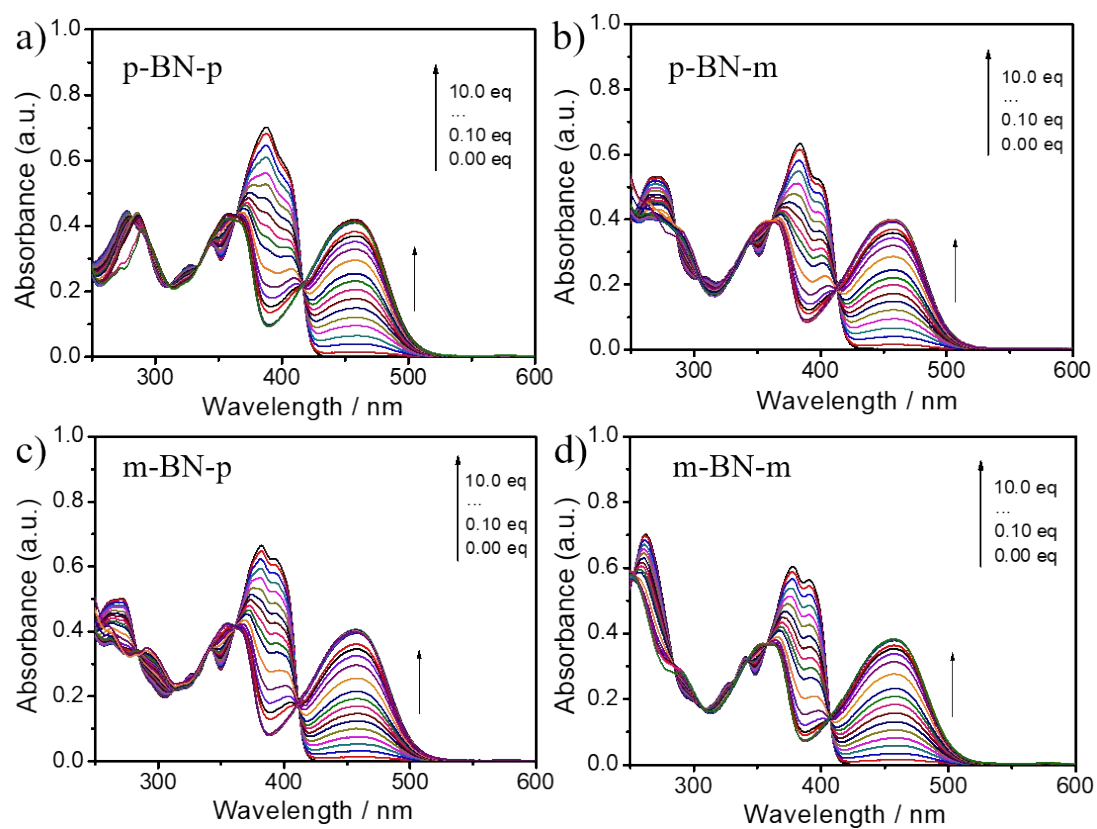

**Figure S1.** Fluoride anion titrations monitored by UV-vis absorption for compound a) p-BN-p, b) p-BN-m, c) m-BN-p, and d) m-BN-m respectively, in THF (10  $\mu$ M).

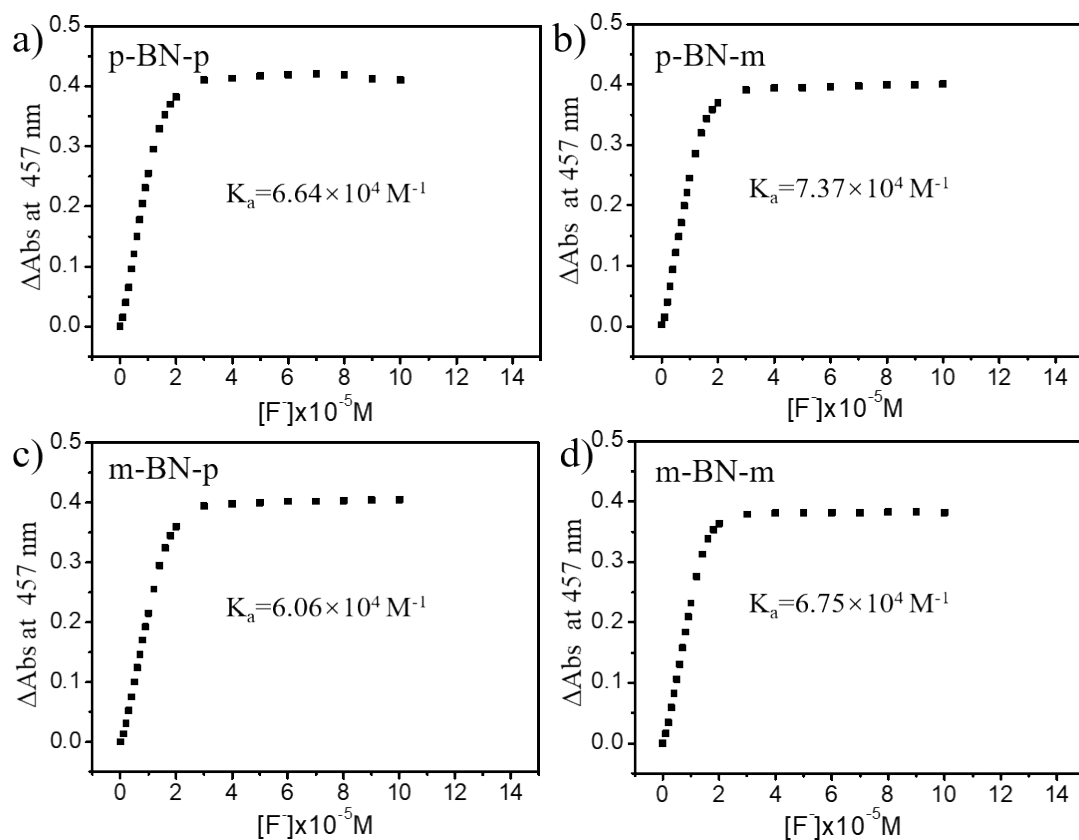

**Figure S2.** The changes of absorbance intensity at 457 nm for compound a) p-BN-p, b) p-BN-m, c) m-BN-p, and d) m-BN-m, respectively, during the titration of 0-10 eq. Fluoride anion.

## 2. Cyclic voltammograms experiments

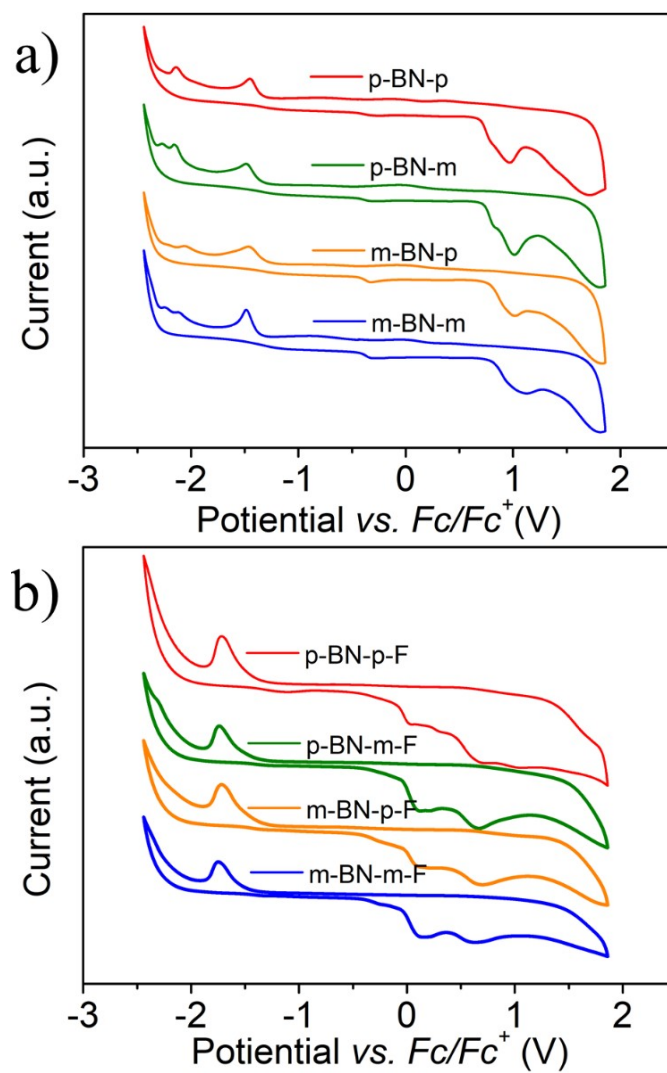

**Figure S3.** Cyclic voltammograms of p-BN-p, p-BN-m, m-BN-p and m-BN-M, respectively, and the profile after the addition of TBAF.

### 3. Summarized photophysical and electrochemical parameters

**Table S1.** Photophysical and electrochemical parameters of the BN-incorporated derivatives and their fluoride-coordinated analogues.

| Sample   | HOMO <sup>exp</sup> (eV) <sup>[a]</sup> | LUMO <sup>exp</sup> (eV) <sup>[a]</sup> | $E_g^{\text{exp}}$ (eV) <sup>[b]</sup> | $E_g^{\text{opt}}$ (eV) <sup>[c]</sup> |
|----------|-----------------------------------------|-----------------------------------------|----------------------------------------|----------------------------------------|
| p-BN-p   | -5.50                                   | -3.46                                   | 2.04                                   | 2.94                                   |
| p-BN-p-F | -4.36                                   | -3.33                                   | 1.03                                   | 2.46                                   |
| p-BN-m   | -5.53                                   | -3.45                                   | 2.08                                   | 2.96                                   |
| p-BN-m-F | -4.42                                   | -3.30                                   | 1.12                                   | 2.46                                   |
| m-BN-p   | -5.58                                   | -3.51                                   | 2.07                                   | 2.99                                   |
| m-BN-p-F | -4.38                                   | -3.33                                   | 1.05                                   | 2.46                                   |
| m-BN-m   | -5.61                                   | -3.43                                   | 2.18                                   | 3.02                                   |
| m-BN-m-F | -4.39                                   | -3.28                                   | 1.11                                   | 2.46                                   |

[a]  $E_{\text{HOMO}}$  and  $E_{\text{LUMO}}$  are obtained from the onset of the first oxidation and reduction curve, respectively. [b]  $E_g$  is calculated by  $E_g = E_{\text{LUMO}} - E_{\text{HOMO}}$ . [c] The optical energy band gap  $E_g$  is calculated by the onset of absorption spectra. Notes: Cyclic voltammetry (CV) measurements were performed in DCM solution using TBAPF<sub>6</sub> as the electrolyte and calibrated by the ferrocene-ferrocenium (Fc/Fc<sup>+</sup>) redox couple, with a scanning rate of 100 mV s<sup>-1</sup>.

#### 4. Single-crystal X-ray structure and crystal data of p-BN-p

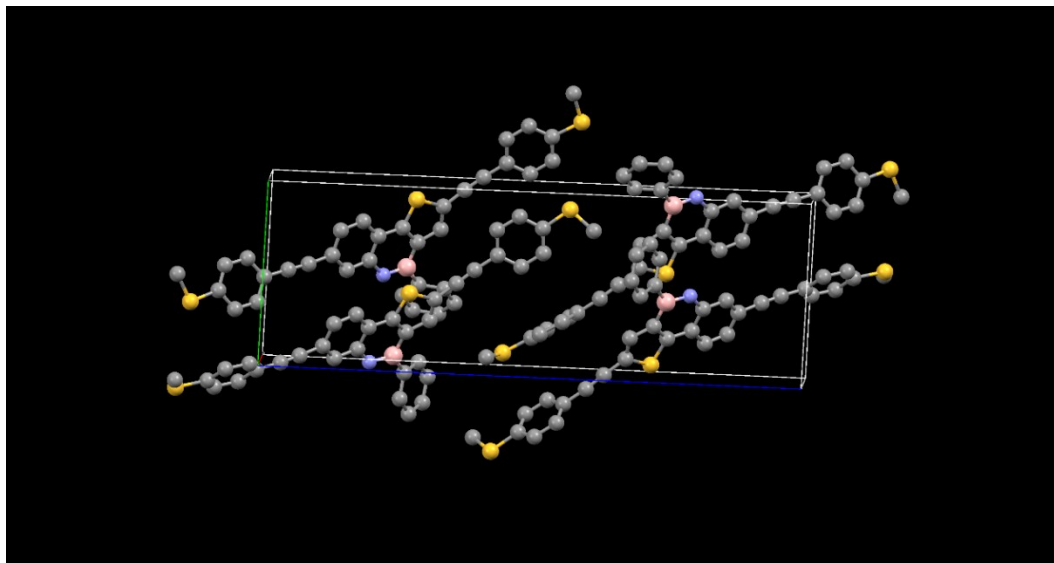

**Figure S4.** Single-crystal X-ray structure of p-BN-p.

**Table S2.** Crystal data and structure refinement for p-BN-p.

|                                         |                                                                    |                              |
|-----------------------------------------|--------------------------------------------------------------------|------------------------------|
| Empirical formula                       | $C_{34}H_{24}BN_3S_3$                                              |                              |
| Formula weight                          | 553.53                                                             |                              |
| Temperature                             | 192.99 K                                                           |                              |
| Wavelength                              | 1.34139 Å                                                          |                              |
| Crystal system                          | Triclinic                                                          |                              |
| Space group                             | P1                                                                 |                              |
| Unit cell dimensions                    | $a = 10.1902(3)$ Å                                                 | $\alpha = 88.437(2)^\circ$ . |
|                                         | $b = 10.2138(3)$ Å                                                 | $\beta = 86.185(2)^\circ$ .  |
|                                         | $c = 28.5888(8)$ Å                                                 | $\gamma = 69.035(2)^\circ$ . |
| Volume                                  | $2772.38(14)$ Å <sup>3</sup>                                       |                              |
| Z                                       | 4                                                                  |                              |
| Density (calculated)                    | 1.326 Mg/m <sup>3</sup>                                            |                              |
| Absorption coefficient                  | $1.709$ mm <sup>-1</sup>                                           |                              |
| F(000)                                  | 1152                                                               |                              |
| Crystal size                            | $0.1 \times 0.06 \times 0.05$ mm <sup>3</sup>                      |                              |
| Theta range for data collection         | $2.695$ to $54.946^\circ$ .                                        |                              |
| Index ranges                            | $-12 \leq h \leq 12$ , $-11 \leq k \leq 12$ , $-34 \leq l \leq 34$ |                              |
| Reflections collected                   | 36406                                                              |                              |
| Independent reflections                 | 15955 [ $R(\text{int}) = 0.0602$ ]                                 |                              |
| Completeness to $\theta = 53.594^\circ$ | 99.7 %                                                             |                              |
| Absorption correction                   | Semi-empirical from equivalents                                    |                              |

|                                   |                                             |
|-----------------------------------|---------------------------------------------|
| Max. and min. transmission        | 0.7508 and 0.5038                           |
| Refinement method                 | Full-matrix least-squares on F <sup>2</sup> |
| Data / restraints / parameters    | 15955 / 3 / 1413                            |
| Goodness-of-fit on F <sup>2</sup> | 1.026                                       |
| Final R indices [I>2sigma(I)]     | R1 = 0.0571, wR2 = 0.1376                   |
| R indices (all data)              | R1 = 0.0724, wR2 = 0.1525                   |
| Absolute structure parameter      | 0.479(15)                                   |
| Extinction coefficient            | n/a                                         |
| Largest diff. peak and hole       | 0.364 and -0.490 e.Å <sup>-3</sup>          |

## 5. The frontier molecular orbitals and energy levels calculated from DFT

| Sample   | HOMO                                                                                | LUMO                                                                                 |
|----------|-------------------------------------------------------------------------------------|--------------------------------------------------------------------------------------|
| p-BN-p   | 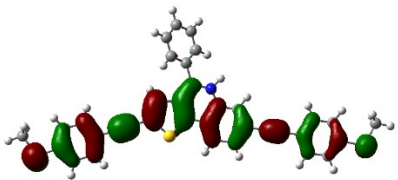   | 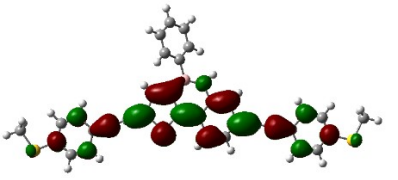   |
| p-BN-p-F | 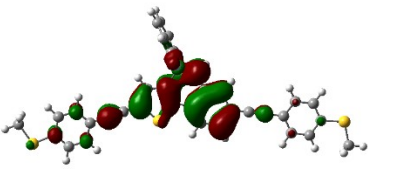   | 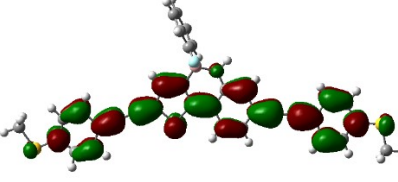   |
| p-BN-m   | 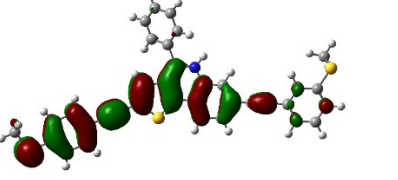  | 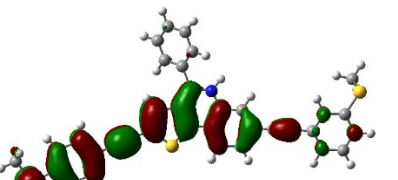  |
| p-BN-m-F | 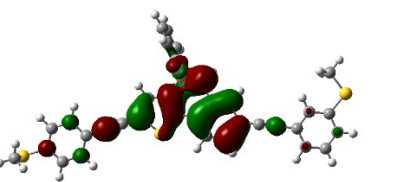 | 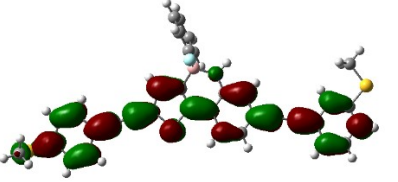 |
| m-BN-p   | 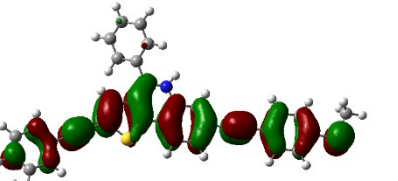 | 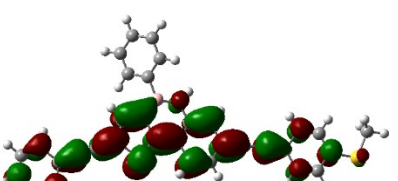 |
| m-BN-p-F | 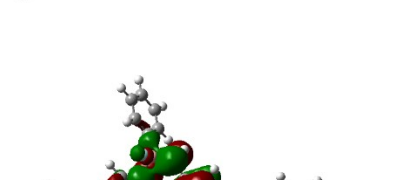 | 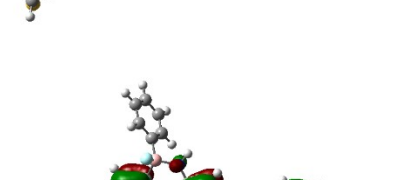 |

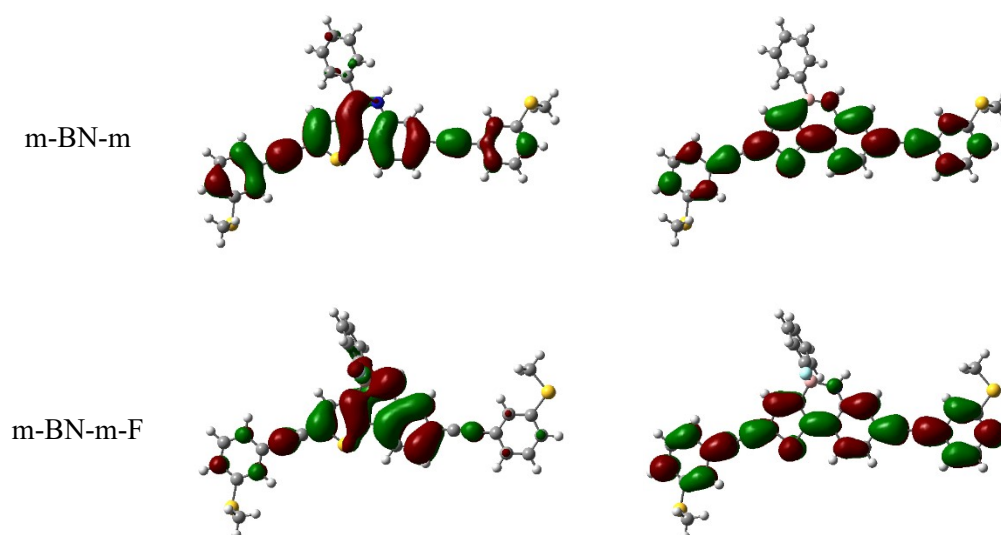

**Figure S5.** DFT-calculated frontier molecular orbitals of the BN-incorporated derivatives and their fluoride-coordinated analogues.

**Table S3.** The energies of frontier molecular orbitals calculated from DFT.

| Sample   | HOMO <sup>cal</sup> (eV) | LUMO <sup>cal</sup> (eV) | $E_g^{cal}$ (eV) |
|----------|--------------------------|--------------------------|------------------|
| p-BN-p   | -5.04                    | -1.88                    | 3.16             |
| p-BN-p-F | -1.86                    | 0.67                     | 2.53             |
| p-BN-m   | -5.13                    | -1.96                    | 3.17             |
| p-BN-m-F | -2.00                    | 0.47                     | 2.47             |
| m-BN-p   | -5.18                    | -1.95                    | 3.23             |
| m-BN-p-F | -1.88                    | 0.65                     | 2.53             |
| m-BN-m   | -5.31                    | -2.02                    | 3.29             |
| m-BN-m-F | -1.96                    | 0.56                     | 2.52             |

## 6. Synthetic routes

Compound p-SMe, m-SMe and Br-Th were synthesized according to the reported literatures.<sup>1-3</sup>

### Synthesis of compound BN-Br

Compound Br-Th (1.80 g, 7.08 mmol) was dissolved in 90 ml o-DCB under argon atmosphere. After Et<sub>3</sub>N (2.93 g, 21.25 mmol) was added into the solution, PhBCl<sub>2</sub> (1.69 g, 10.62 mmol) was injected slowly and heated to 180 °C for 12 h. After cooling to the room temperature, the solvent was removed by reduced-pressure distillation and the residue was extracted with DCM and washed for several times. The combined organic phase was dried over Na<sub>2</sub>SO<sub>4</sub> and filtered. Then, the solvent was evaporated in vacuum and the product was purified by chromatography (DCM: PE = 1:5) to give product BN-Br as white solid in 90% yield (2.17 g, 6.37 mmol). <sup>1</sup>H NMR (400 MHz, CDCl<sub>3</sub>) δ 7.90-7.86 (m, 3H), 7.77 (d, *J* = 4.8 Hz, 2H), 7.56 (d, *J* = 2.0 Hz, 1H), 7.54-7.50 (m, 3H), 7.48 (d, *J* = 5.2 Hz, 1H), 7.36 (dd, *J* = 8.8, 2.0 Hz, 1H). <sup>13</sup>C NMR (100 MHz, CDCl<sub>3</sub>) δ 151.36, 138.83, 133.11, 131.71, 129.55, 128.37, 126.31, 124.92, 124.63, 121.50, 120.99, 120.65.

### Synthesis of compound Br-BN-Br

Compound BN-Br (1.00 g, 2.94 mmol) was dissolved in DCM. After cooling to 0 °C, NBS (523 mg, 2.94 mmol) in 10 ml DCM was added slowly into the flask in the dark and stirred overnight. After the reaction was completed, the solvent was evaporated and the residue was purified by chromatography (DCM:PE=1:5) to give a white solid (1.01 g, 2.41 mmol), yielding 82%. <sup>1</sup>H NMR (400 MHz, CDCl<sub>3</sub>) δ 7.84-7.82 (m, 2H), 7.77 (s, 1H), 7.71-7.68 (m, 1H), 7.55 (d, *J* = 2.0 Hz, 1H), 7.53-7.51 (m, 3H), 7.36 (dd, *J* = 8.4, 1.6 Hz, 1H).

### Synthesis of compound p-BN-p

Compound Br-BN-Br (197 mg, 0.47 mmol), CuI (8.96 mg, 0.047 mmol), PdCl<sub>2</sub>(PPh<sub>3</sub>)<sub>2</sub> (33 mg, 0.047 mmol) were added into 50 ml Schenk tube under argon atmosphere. Then, 10 ml degassed NEt<sub>3</sub> was injected into the system, followed by the addition of compound p-SMe (153 mg, 1.03 mmol) with syringe. The solution was heated at 60 °C

for overnight. After cooling to room temperature, the reaction mixture was concentrated and extracted 3 times with EA. The combined organic layers were dried with Na<sub>2</sub>SO<sub>4</sub>, after the solvent was removed, a crude which was purified by recrystallization with DCM/PE to afford a yellow powder p-BN-p (182 mg, 0.33 mmol) in 70% yield. <sup>1</sup>H NMR (600 MHz, C<sub>2</sub>Cl<sub>4</sub>D<sub>2</sub>) δ 7.94 (s, 1H), 7.92-7.91 (m, 2H), 7.90-7.88 (d, *J* = 8.4 Hz, 1H) 7.87 (s, 1H), 7.59 (d, *J* = 1.2 Hz, 1H), 7.58-7.54 (m, 3H), 7.53(d, *J* = 8.4 Hz, 2H) 7.51 (d, *J* = 8.4 Hz, 2H), 7.42 (dd, *J* = 8.4, 1.2 Hz, 1H), 7.26 (d, *J* = 8.4, 2H), 7.25 (d, *J* = 8.4, 2H), 2.53 (s, 1H), 2.53 (s, 1H). <sup>13</sup>C NMR (150 MHz, C<sub>2</sub>Cl<sub>4</sub>D<sub>2</sub>) δ 151.82, 139.54, 139.38, 137.63, 136.62, 132.82, 131.74, 131.51, 129.46, 128.19, 125.43, 125.40, 124.93, 124.70, 122.63, 122.39, 121.60, 120.54, 118.76, 118.47, 94.34, 90.61, 89.13, 82.91, 15.03, 15.00. TOF-MS-EI C<sub>34</sub>H<sub>24</sub>BNS<sub>3</sub> *m/z* [M<sup>+</sup>] calcd for 553.1164 found: 553.1169.

#### **Synthesis of compound p-BN-Br**

Compound Br-BN-Br (400 mg, 0.96 mmol), CuI (9.14 mg, 0.048 mmol), PdCl<sub>2</sub>(PPh<sub>3</sub>)<sub>2</sub> (33.5 mg, 0.048 mmol) were added into 100 ml Schenk tube under argon atmosphere. Then, 20 ml degassed THF and NEt<sub>3</sub> (1:1, volume) were injected into the tube, followed by the addition of compound p-SMe (142 mg, 0.96 mmol) with syringe. The solution was heated at 60 °C for overnight. After cooling to room temperature, the reaction mixture was concentrated and extracted 3 times with EA. The combined organic layers were dried with Na<sub>2</sub>SO<sub>4</sub>, after the solvent was removed, a crude which was purified by chromatography with DCM/PE=1/5 to afford a white powder p-BN-Br (278 mg, 0.57 mmol) in 60% yield. <sup>1</sup>H NMR (400 MHz, DMSO-d<sub>6</sub>) δ 10.46 (s, 1H), 8.07 (d, *J* = 2.0 Hz, 1H), 8.04 - 8.01 (m, 2H), 7.99 (s, 1H), 7.92 (d, *J* = 8.4 Hz, 1H), 7.62-7.56 (m, 5H), 7.47 (dd, *J* = 8.8, 2.0 Hz, 1H), 7.36 (d, *J* = 8.4 Hz, 2H), 2.57 (s, 3H). <sup>13</sup>C NMR (100 MHz, DMSO) δ 151.84, 140.83, 140.75, 137.22, 134.30, 132.09, 130.04, 128.58, 126.78, 126.05, 125.03, 122.37, 121.79, 121.71, 119.61, 117.99, 94.98, 83.21, 14.63.

#### **Synthesis of compound p-BN-m**

Compound p-BN-Br (194 mg, 0.40 mmol), CuI (3.8 mg, 0.02 mmol), PdCl<sub>2</sub>(PPh<sub>3</sub>)<sub>2</sub> (14 mg, 0.02 mmol) were added into 50 ml Schenk tube under argon atmosphere. After that, 10 ml degassed THF and NEt<sub>3</sub> (1:1, volume) were injected into the system,

followed by the addition of compound m-SMe (65 mg, 0.44 mmol) with syringe. The solution was heated at 60 °C for overnight. After cooling to room temperature, the reaction mixture was concentrated and extracted 3 times with EA. The combined organic layers were dried with Na<sub>2</sub>SO<sub>4</sub>, after the solvent was removed, a crude which was purified by recrystallization with DCM/PE to afford a yellow powder p-BN-m (150 mg, 0.27 mmol) in 68% yield. <sup>1</sup>H NMR (400 MHz, C<sub>2</sub>Cl<sub>4</sub> D<sub>2</sub>) δ 7.93-7.88 (m, 5H), 7.60 (s, 1H), 7.58-7.55 (m, 3H), 7.51 (d, *J* = 8.4 Hz, 2H), 7.46 (dd, *J* = 8, *J* = 1.2 Hz, 1H), 7.42 (d, *J* = 7.6 Hz, 1H), 7.34 (t, *J* = 7.6 Hz, 1H), 7.25 (t, *J* = 9.2 Hz, 1H), 7.27-7.22 (m, 3H), 2.53 (s, 3H), 2.53 (s, 3H). <sup>13</sup>C NMR (100 MHz, C<sub>2</sub>Cl<sub>4</sub> D<sub>2</sub>) δ 151.93, 139.73, 138.79, 137.78, 136.77, 133.01, 131.69, 129.65, 128.72, 128.37, 128.17, 126.35, 125.53, 125.15, 124.89, 124.87, 123.45, 122.63, 122.48, 121.95, 120.88, 118.61, 94.56, 90.38, 89.58, 83.08, 15.49, 15.15. TOF-MS-EI C<sub>34</sub>H<sub>24</sub>BNS<sub>3</sub> *m/z* [M<sup>+</sup>] calcd for 553.1164 found: 553.1166. TOF-MS-EI C<sub>34</sub>H<sub>24</sub>BNS<sub>3</sub> *m/z* [M<sup>+</sup>] calcd for 553.1164 found: 553.1169.

### Synthesis of compound m-BN-Br

Compound Br-BN-Br (200 mg, 0.48 mmol), CuI (9.14 mg, 0.024 mmol), PdCl<sub>2</sub>(PPh<sub>3</sub>)<sub>2</sub> (33.5 mg, 0.024 mmol) were added into 50 ml Schenk tube under argon atmosphere. Then, 10 ml degassed THF and NEt<sub>3</sub> (1:1, volume) were injected into the tube, followed by the addition of compound m-SMe (71 mg, 0.48 mmol) with syringe. The solution was heated at 60 °C for overnight. After cooling to room temperature, the reaction mixture was concentrated and extracted 3 times with EA. The combined organic layers were dried with Na<sub>2</sub>SO<sub>4</sub>, after the solvent was removed, a crude which was purified by chromatography with DCM/PE=1/5 to afford a white powder m-BN-Br (127 mg, 0.26 mmol) in 55% yield. <sup>1</sup>H NMR (400 MHz, DMSO-d<sub>6</sub>) δ 10.41 (s, 1H), 8.02 (d, *J* = 2.0 Hz, 1H), 7.99-7.97 (m, 3H), 7.87 (d, *J* = 8.8 Hz, 1H), 7.57-7.53 (m, 3H), 7.46 (s, 1H), 7.41 (dd, *J* = 8.4, 2.0 Hz, 1H), 7.38-7.31 (m, 3H), 2.53 (s, 3H). <sup>13</sup>C NMR (100 MHz, DMSO) δ 152.07, 140.78, 139.76, 137.69, 134.29, 130.03, 129.69, 128.57, 128.09, 128.03, 127.05, 126.78, 125.02, 122.99, 122.38, 121.79, 121.43, 119.58, 94.59, 83.62, 14.88.

### Synthesis of compound m-BN-p

Compound m-BN-Br (100 mg, 0.21 mmol), CuI (2 mg, 0.01 mmol), PdCl<sub>2</sub>(PPh<sub>3</sub>)<sub>2</sub> (7.2mg, 0.01 mmol) were added into 50 ml Schenk tube under argon atmosphere. After that, 10 ml degassed NEt<sub>3</sub> was injected into the system, followed by the addition of compound p-SMe (34 mg, 0.21 mmol) with syringe. The solution was heated at 60 °C for overnight. After cooling to room temperature, the reaction mixture was concentrated and extracted 3 times with EA. The combined organic layers were dried with Na<sub>2</sub>SO<sub>4</sub>, after the solvent was removed, a crude which was purified by recrystallization with DCM/PE to afford a yellow powder m-BN-p (68 mg, 0.13 mmol) in 60% yield. <sup>1</sup>H NMR (600 MHz, C<sub>2</sub>Cl<sub>4</sub> D<sub>2</sub>) δ 7.96 (s, 1H), 7.92-7.89 (m, 3H), 7.87 (s, 1H), 7.60 (d, *J* = 1.2 Hz, 1H), 7.57-7.54 (m, 3H), 7.53 (d, *J* = 8.4 Hz, 2H), 7.44 (s, 1H), 7.43 (dd, *J* = 8.4, 1.2 Hz, 1H), 7.37 (d, *J* = 7.8 Hz, 1H), 7.31 (t, *J* = 7.8 Hz, 1H), 7.27-7.24 (m, 3H), 2.53 (s, 3H), 2.53 (s, 3H). <sup>13</sup>C NMR (150 MHz, C<sub>2</sub>Cl<sub>4</sub> D<sub>2</sub>) δ 151.82, 139.18, 138.46, 137.45, 136.79, 132.60, 131.52, 129.25, 128.33, 128.11, 127.98, 127.55, 126.09, 125.22, 124.74, 124.50, 122.81, 122.50, 121.83, 121.40, 120.29, 118.53, 93.76, 90.43, 88.89, 83.00, 15.11, 14.81. TOF-MS-EI C<sub>34</sub>H<sub>24</sub>BNS<sub>3</sub> *m/z* [M<sup>+</sup>] calcd for 553.1164 found: 553.1167.

### Synthesis of compound m-BN-m

Compound Br-BN-Br (250 mg, 0.60 mmol), CuI (11.35 mg, 0.06 mmol), PdCl<sub>2</sub>(PPh<sub>3</sub>)<sub>2</sub> (42 mg, 0.06 mmol) were added into 50 ml Schenk tube under argon atmosphere. After that, 10 ml degassed NEt<sub>3</sub> was injected into the system, followed by the addition of compound m-SMe (195 mg, 1.31 mmol) with syringe. The solution was heated at 60 °C for overnight. After cooling to room temperature, the reaction mixture was concentrated and extracted 3 times with EA. The combined organic layers were dried with Na<sub>2</sub>SO<sub>4</sub>, after the solvent was removed, a crude which was purified by recrystallization with DCM/PE to afford a yellow powder m-BN-m (215 mg, 0.39 mmol) in 65% yield. <sup>1</sup>H NMR (400 MHz, C<sub>2</sub>Cl<sub>4</sub> D<sub>2</sub>) δ 7.96 (s, 1H), 7.93-7.88 (m, 4H), 7.60-7.56 (m, 4H), 7.46-7.42 (m, 3H), 7.39 (t, *J* = 7.6 Hz, 2H), 7.32 (td, *J* = 7.6, 3.2 Hz, 2H), 7.27-7.25 (m, 2H), 2.54 (s, 3H), 2.54 (s, 3H). <sup>13</sup>C NMR (100 MHz, C<sub>2</sub>Cl<sub>4</sub> D<sub>2</sub>) δ

151.72, 138.43, 138.37, 137.38, 136.75, 132.58, 129.23, 128.35, 128.30, 128.06, 127.95, 127.75, 127.52, 126.04, 125.95, 124.76, 124.48, 123.02, 122.77, 122.15, 121.88, 121.53, 120.42, 93.76, 90.00, 89.14, 82.98, 15.08, 15.07. TOF-MS-EI  $\text{C}_{34}\text{H}_{24}\text{BNS}_3$  m/z  $[\text{M}^+]$  calcd for 553.1164 found: 553.1166.

## 7. $^1\text{H}$ NMR, $^{13}\text{C}$ NMR and HRMS spectra.

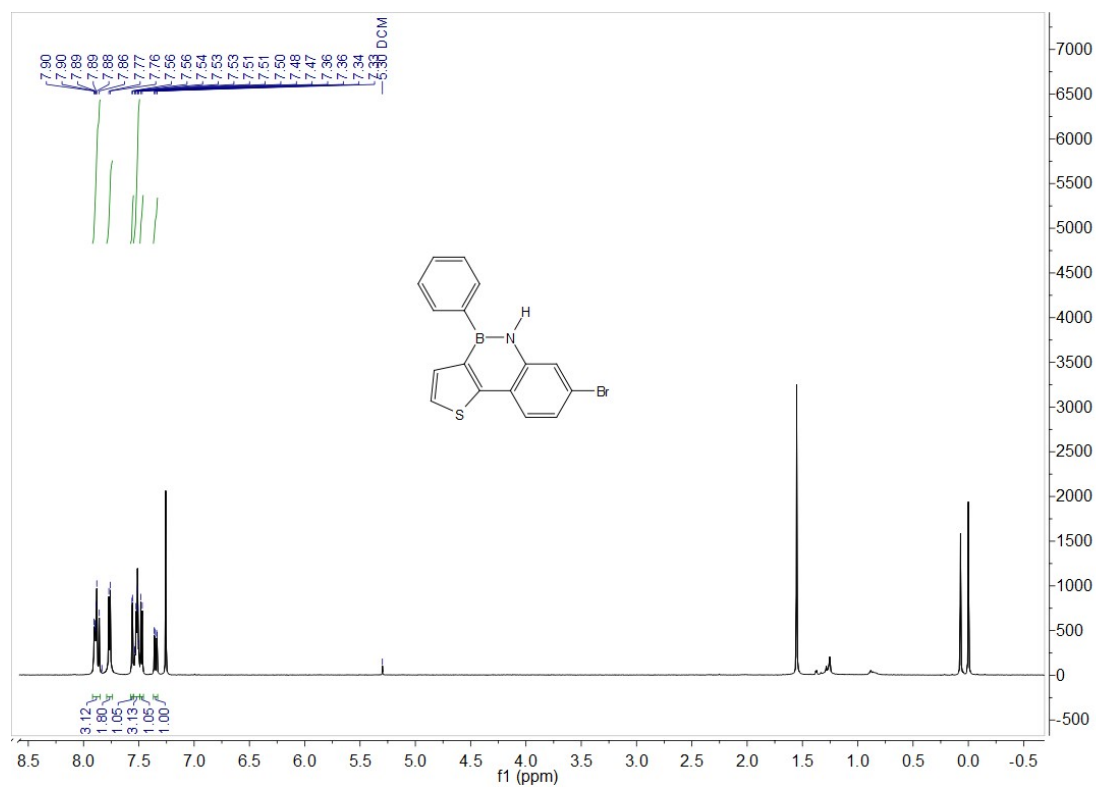

Figure S6.  $^1\text{H}$  NMR spectrum of BN-Br in  $\text{CDCl}_3$ .

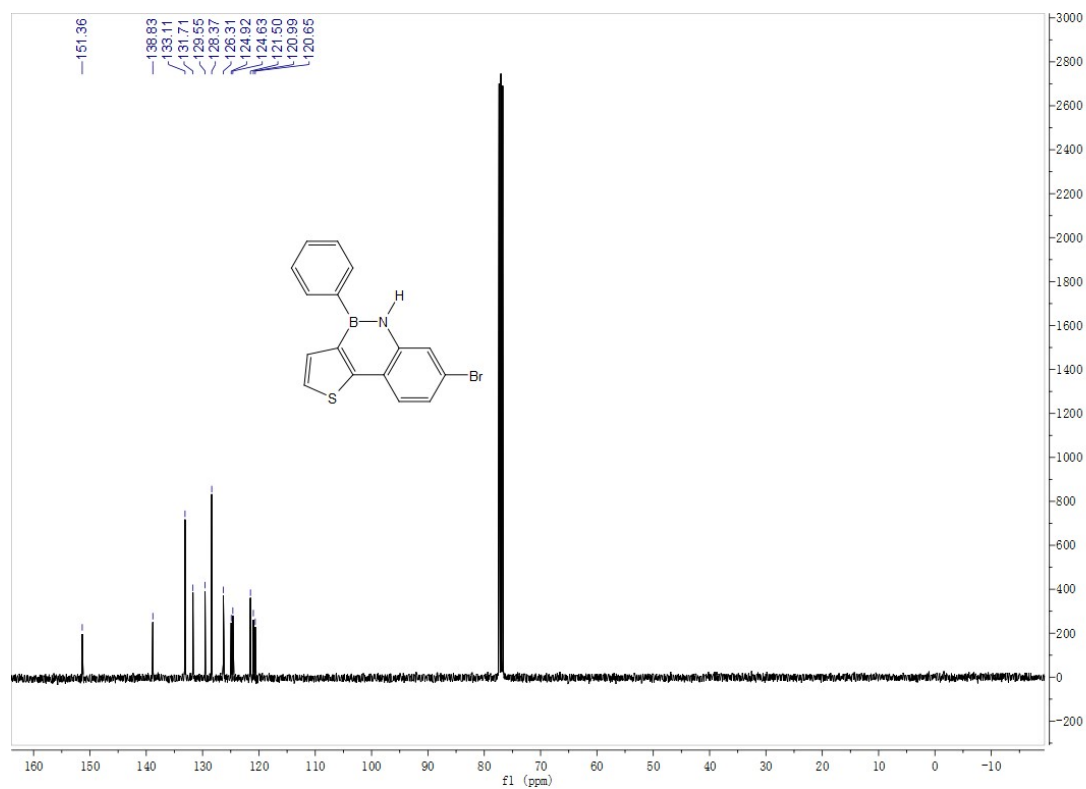

Figure S7.  $^{13}\text{C}$  NMR spectrum of BN-Br in  $\text{CDCl}_3$ .

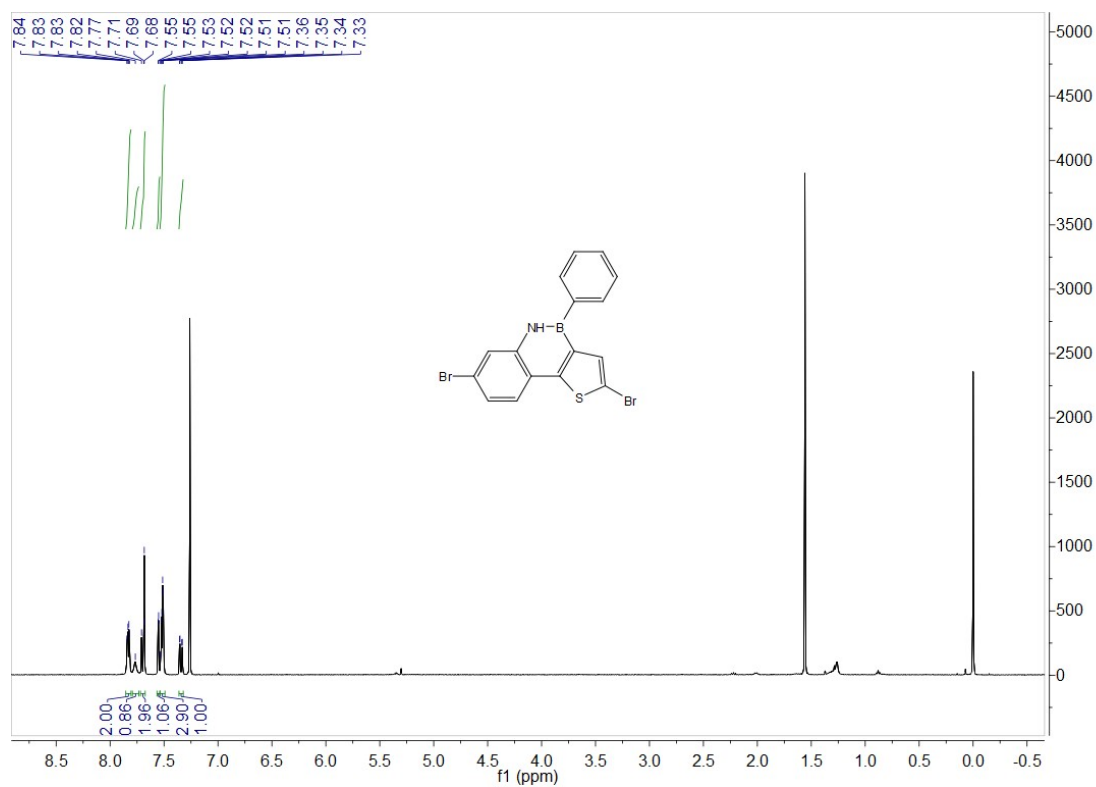

**Figure S8.**  $^1\text{H}$  NMR spectrum of Br-BN-Br in  $\text{CDCl}_3$ .

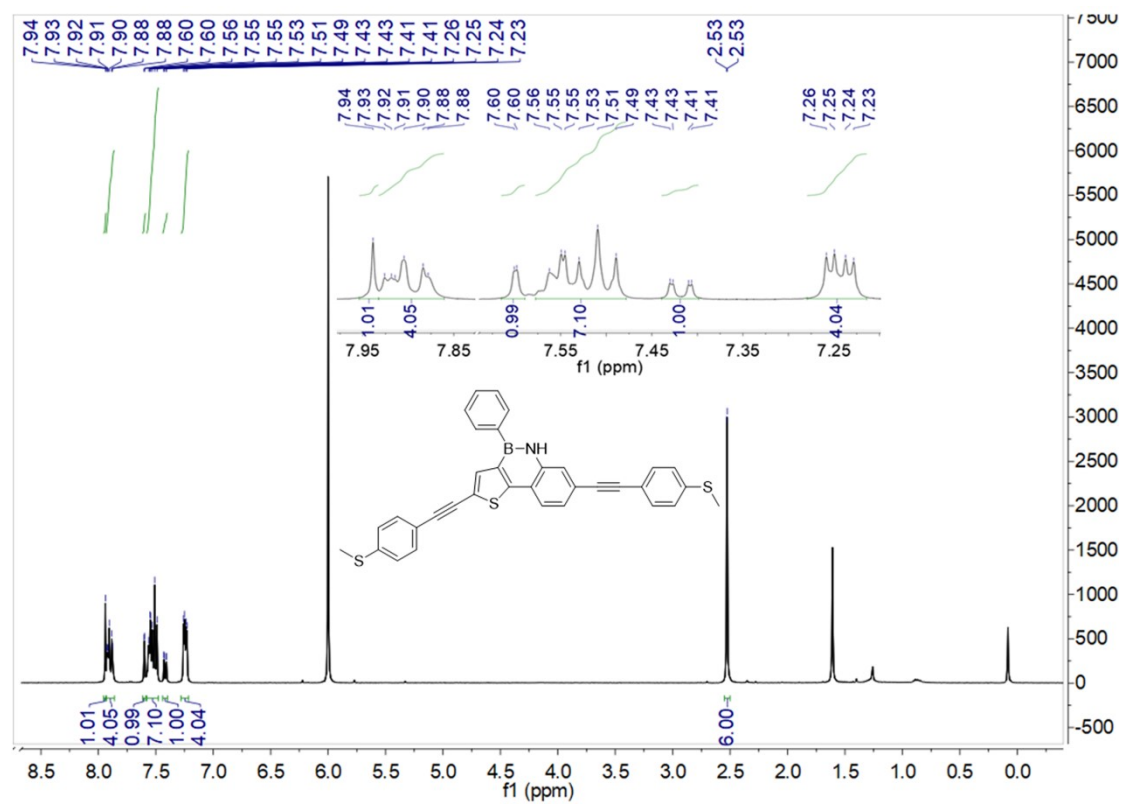

**Figure S9.**  $^1\text{H}$  NMR spectrum of p-BN-p in  $\text{C}_2\text{Cl}_4\text{D}_2$ .

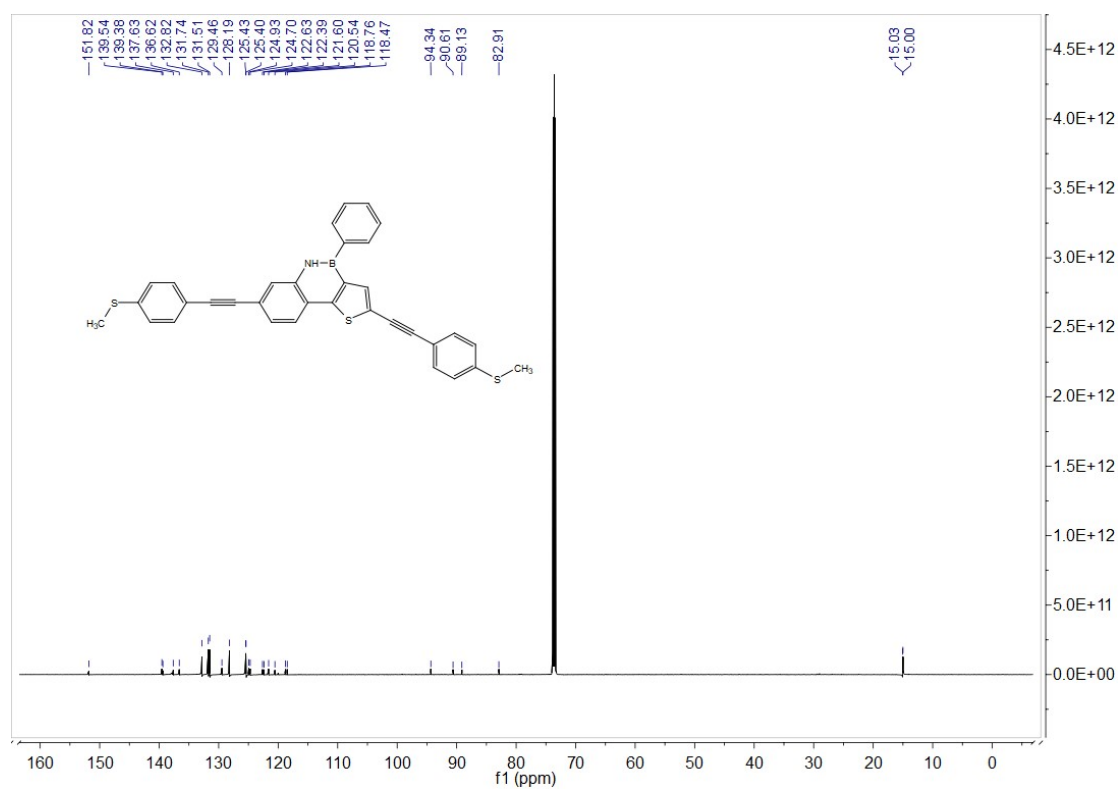

**Figure S10.**  $^{13}\text{C}$  NMR spectrum of p-BN-p in  $\text{C}_2\text{Cl}_4\text{D}_2$ .

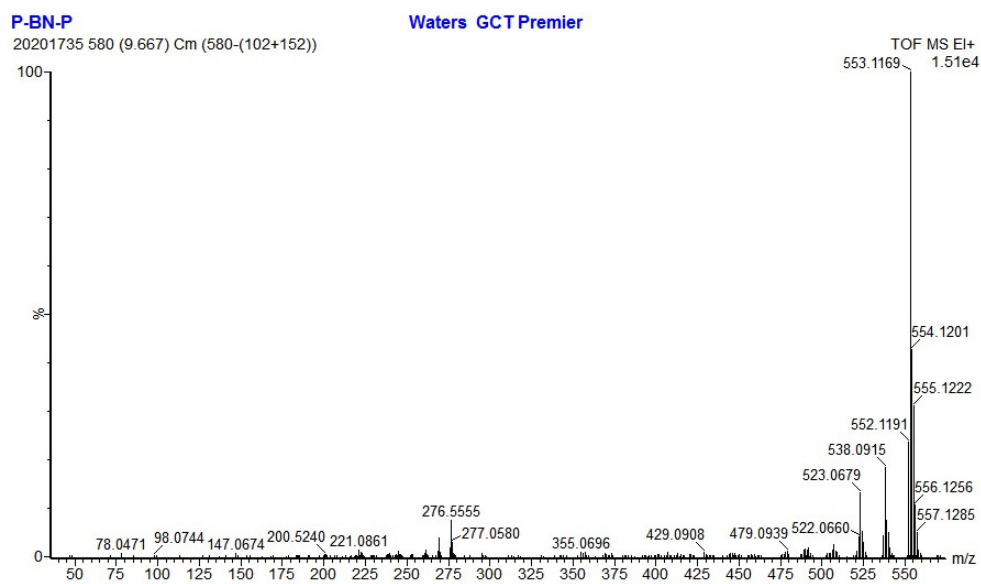

**Figure S11.** HRMS spectrum of p-BN-p.

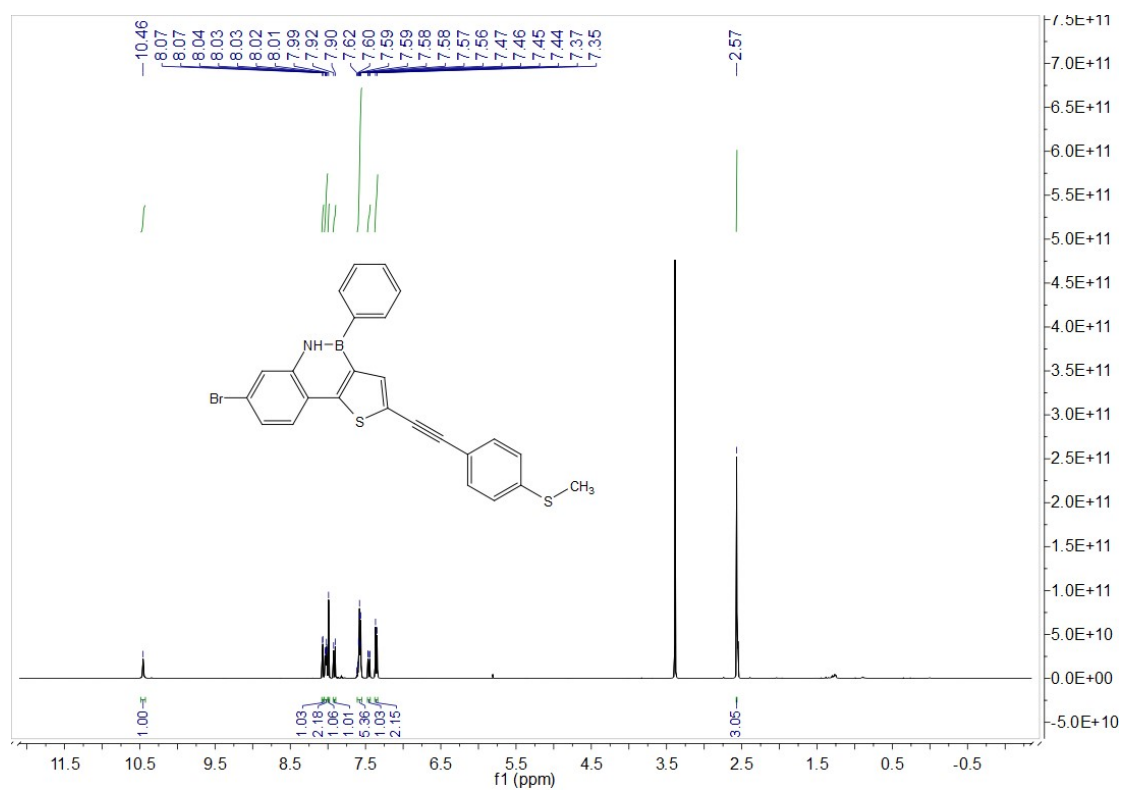

**Figure S12.** <sup>1</sup>H NMR spectrum of p-BN-Br in DMSO-d<sub>6</sub>.

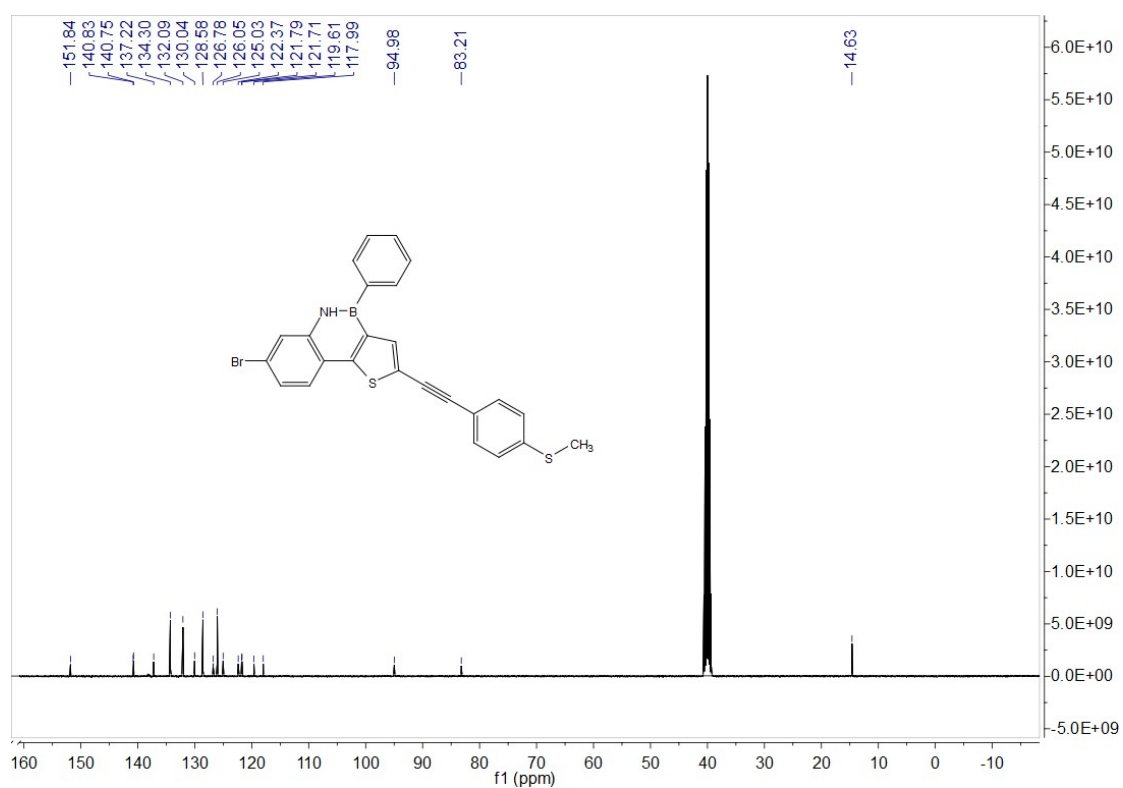

**Figure S13.** <sup>13</sup>C NMR spectrum of p-BN-Br in DMSO-d<sub>6</sub>.

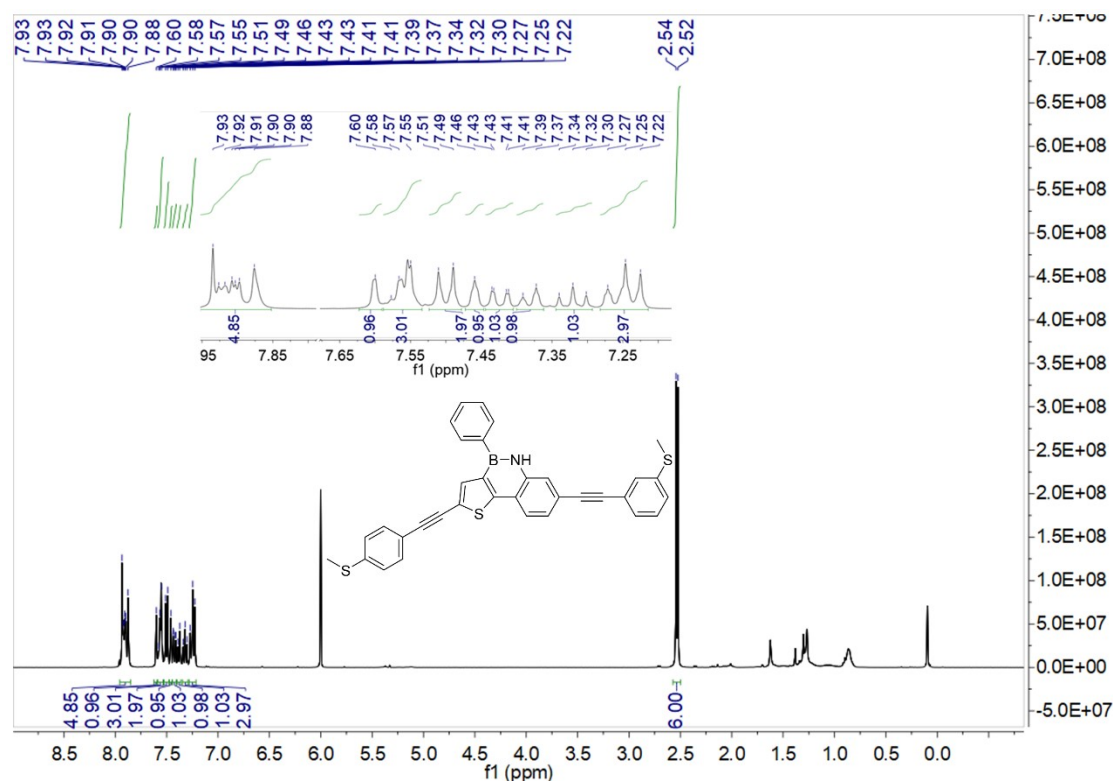

**Figure S14.** <sup>1</sup>H NMR spectrum of p-BN-m in C<sub>2</sub>Cl<sub>4</sub>D<sub>2</sub>.

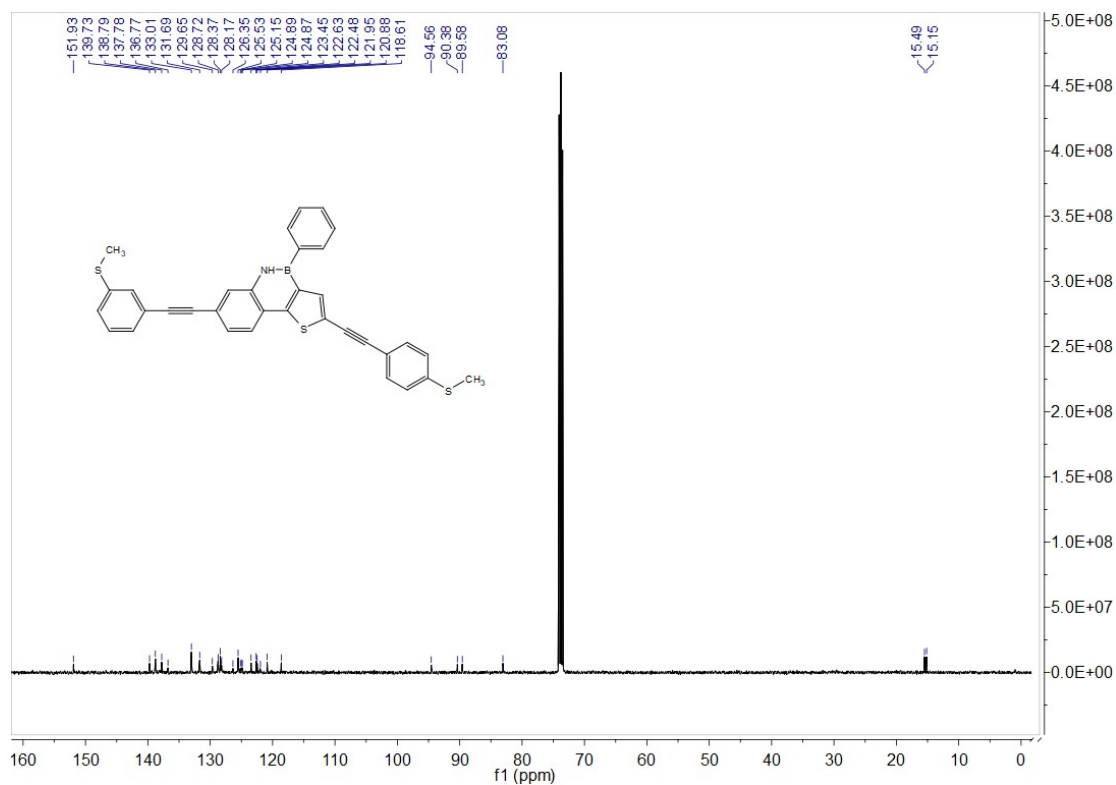

**Figure S15.** <sup>13</sup>C NMR spectrum of p-BN-m in C<sub>2</sub>Cl<sub>4</sub>D<sub>2</sub>.

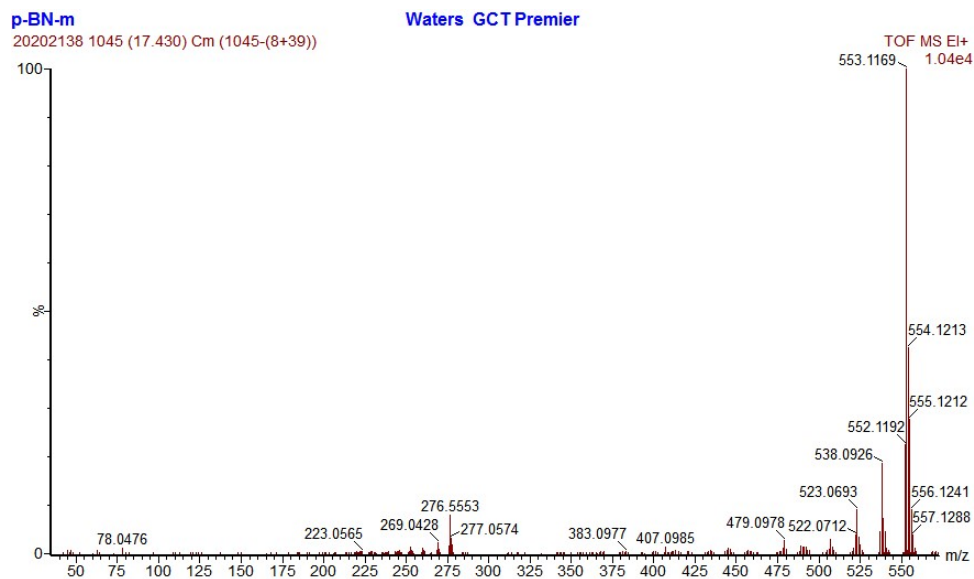

Figure S16. HRMS spectrum of p-BN-m.

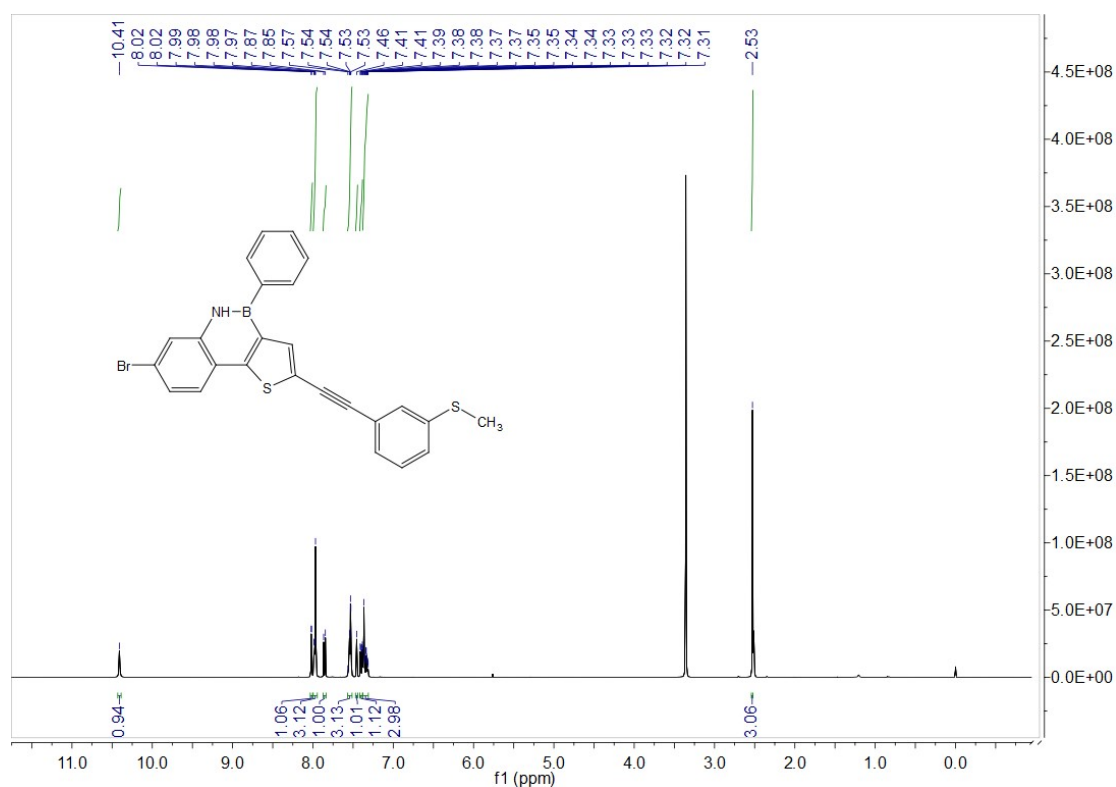

Figure S17.  $^1\text{H}$  NMR spectrum of m-BN-Br in  $\text{DMSO-d}_6$ .

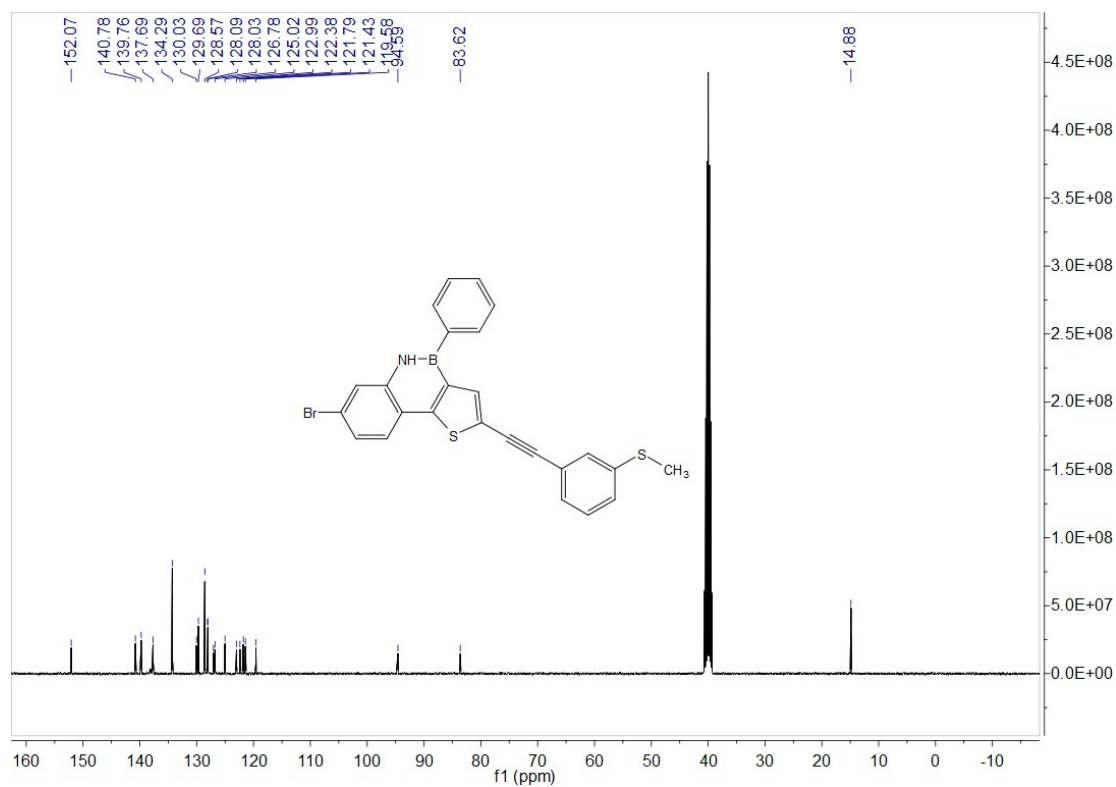

**Figure S18.**  $^{13}\text{C}$  NMR spectrum of m-BN-Br in  $\text{DMSO-d}_6$ .

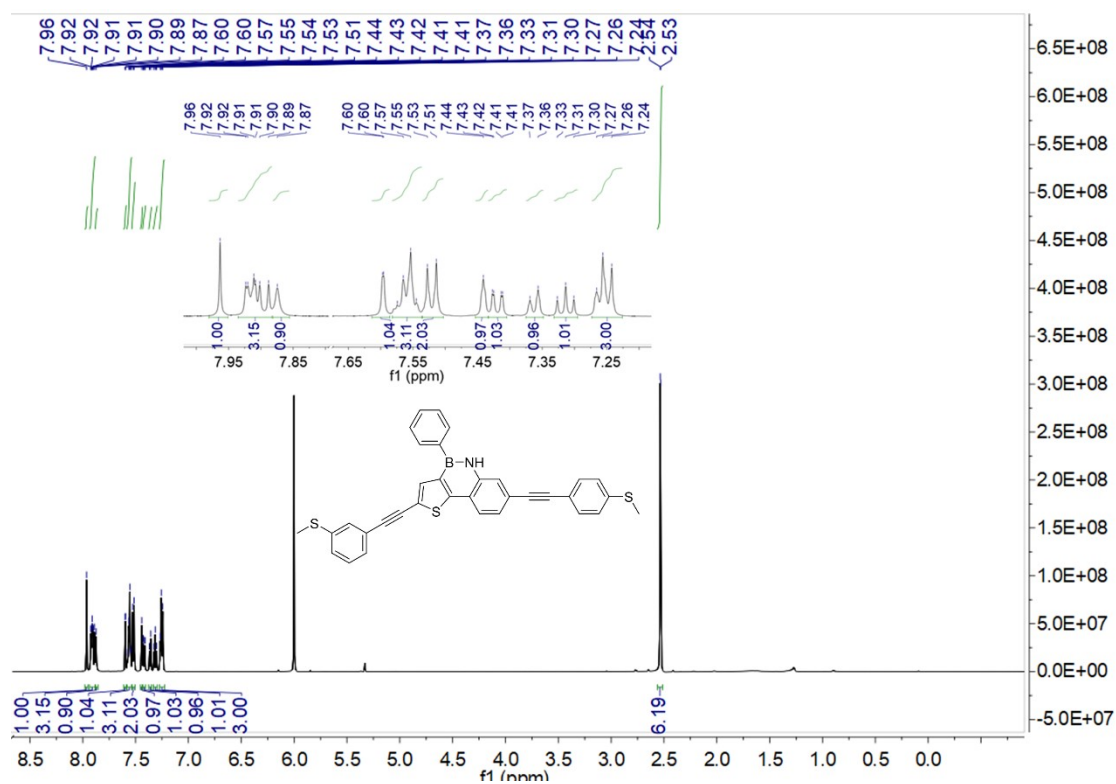

**Figure S19.**  $^1\text{H}$  NMR spectrum of m-BN-p in  $\text{C}_2\text{Cl}_4\text{D}_2$ .

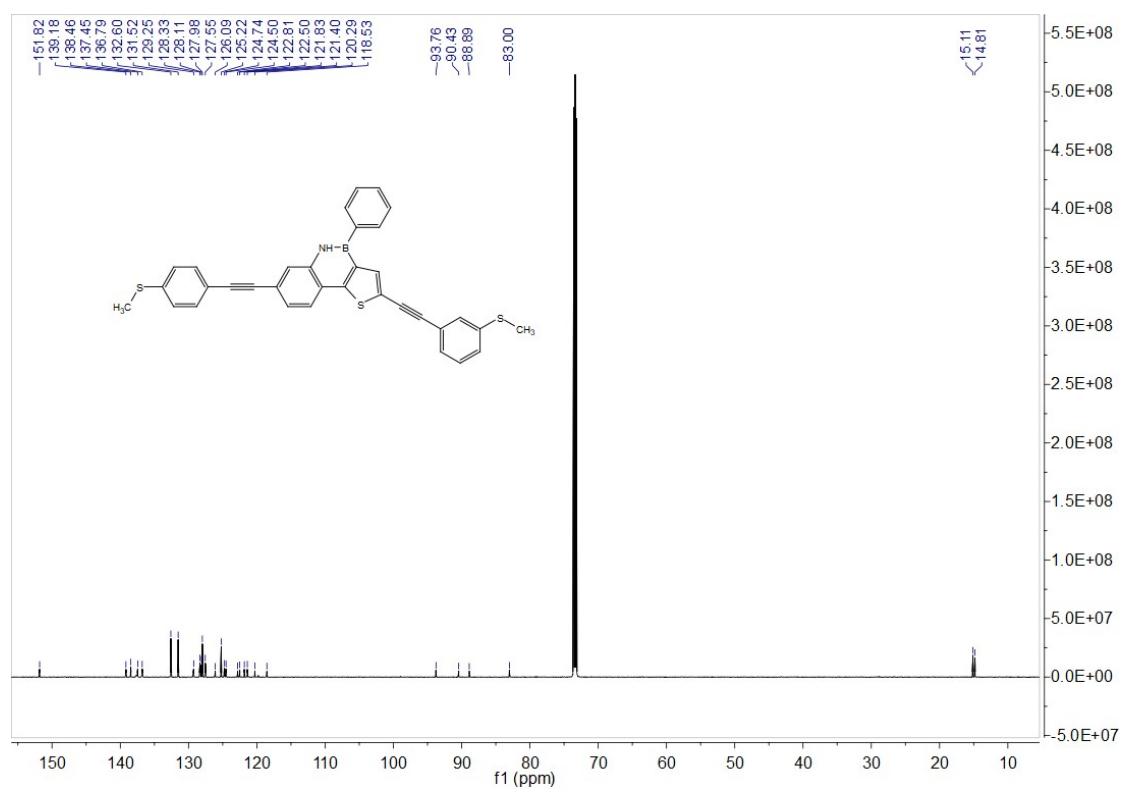

**Figure S20.** <sup>13</sup>C NMR spectrum of m-BN-p in C<sub>2</sub>Cl<sub>4</sub>D<sub>2</sub>.

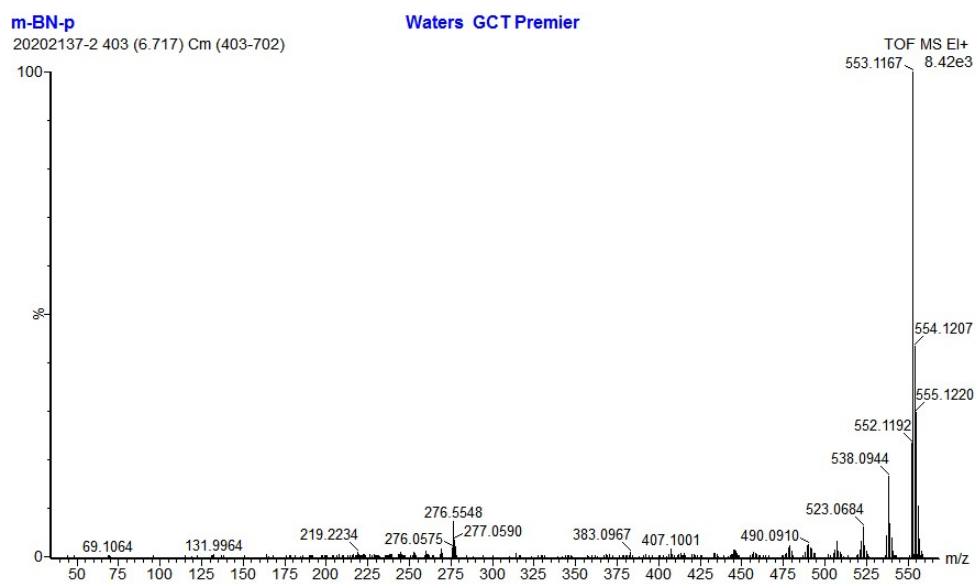

**Figure S21.** HRMS spectrum of m-BN-p.

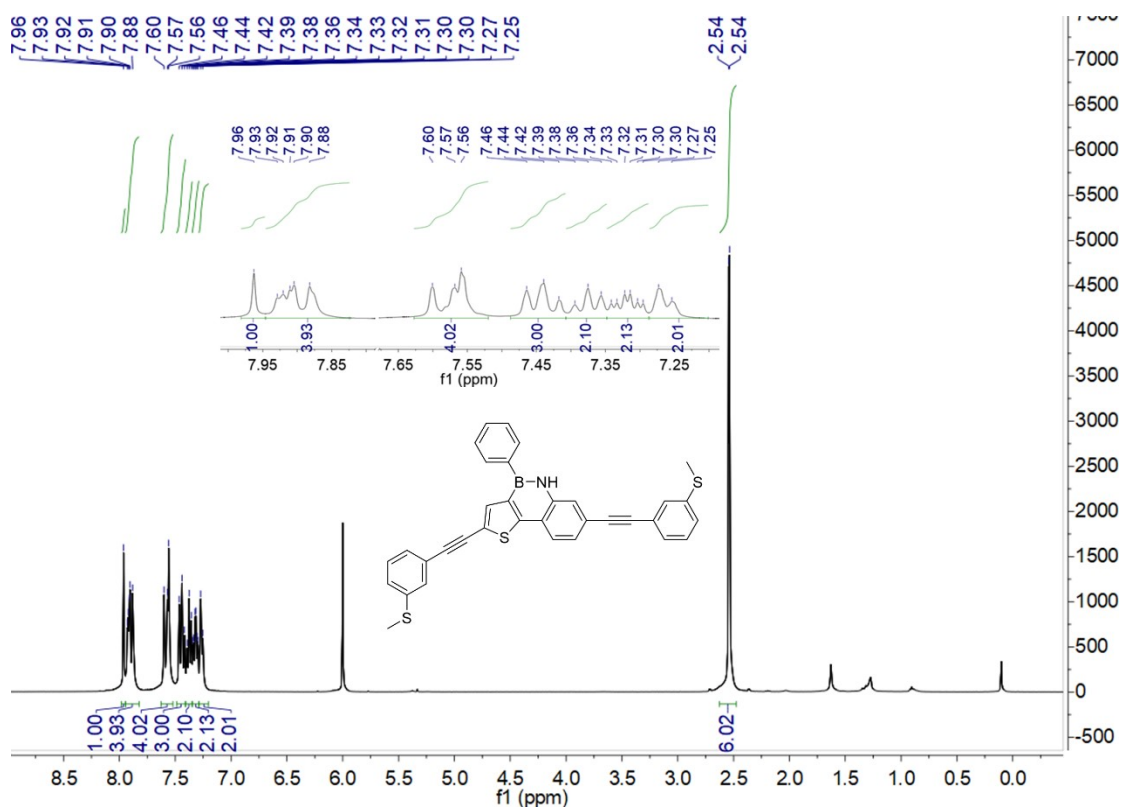

**Figure S22.** <sup>1</sup>H NMR spectrum of m-BN-m in C<sub>2</sub>Cl<sub>4</sub>D<sub>2</sub>.

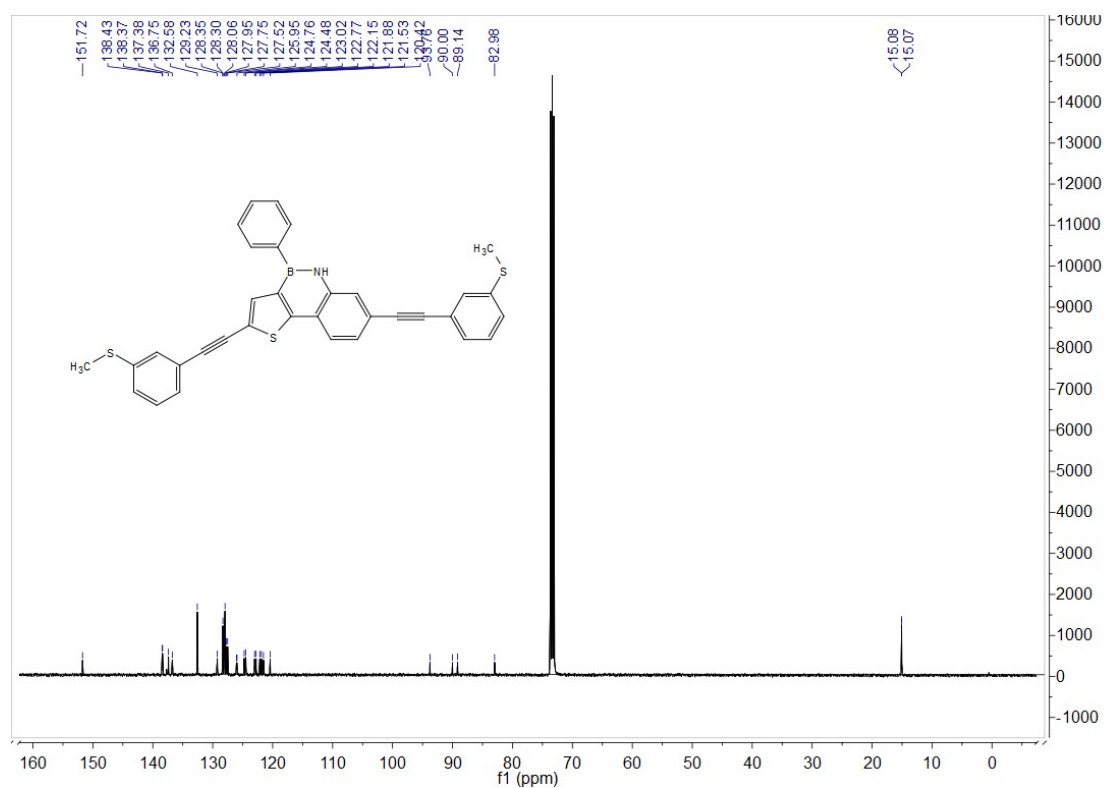

**Figure S23.** <sup>13</sup>C NMR spectrum of m-BN-m in C<sub>2</sub>Cl<sub>4</sub>D<sub>2</sub>.

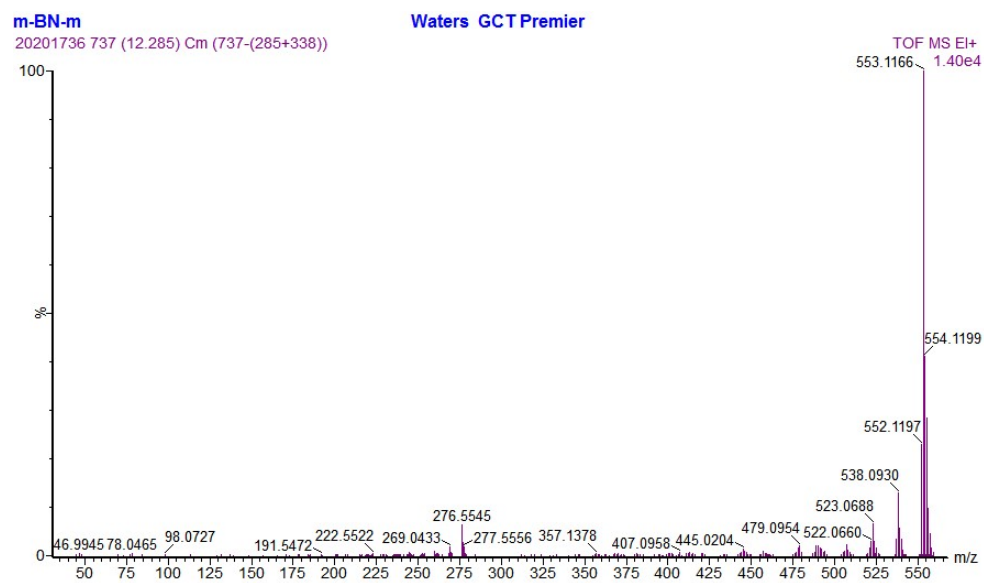

**Figure S24.** HRMS spectrum of m-BN-m.

## References

- 1 J. Cui, Y. L. Wong, M. Zeller, A. D. Hunter and Z. Xu, *Angew. Chem. Int. Ed. Engl.*, 2014, **53**, 14438-14442.
- 2 J.-W. Ha, H. S. Kim, C. E. Song, H. J. Park and D.-H. Hwang, *J. Mater. Chem. C*, 2020, **8**, 12265-12271.
- 3 Y. G. Zhi, S. W. Lai, Q. K. W. Chan, Y. C. Law, G. S. M. Tong and C. M. Che, *Eur. J. Org. Chem.*, 2006, **2006**, 3125-3139.
